# Supplementary material for: New particle formation in the fresh flue-gas plume from a coal-fired power plant: effect of flue-gas cleaning
Source: Copernicus journal article supplement (doi:10.5194/acp-16-7485-2016), 2016-06-15
Supplement: Supplementary file 1 [file acp-16-7485-2016-supplement.pdf]

Supplement of Atmos. Chem. Phys., 16, 7485–7496, 2016  
<http://www.atmos-chem-phys.net/16/7485/2016/>  
doi:10.5194/acp-16-7485-2016-supplement  
© Author(s) 2016. CC Attribution 3.0 License.

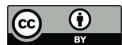

*Supplement of*

## **New particle formation in the fresh flue-gas plume from a coal-fired power plant: effect of flue-gas cleaning**

**Fanni Mylläri et al.**

*Correspondence to:* Topi Rönkkö (topi.ronkko@tut.fi)

The copyright of individual parts of the supplement might differ from the CC-BY 3.0 licence.

## Supplementary Information 1

Table S1. Coal properties

|               |       | Coal        |
|---------------|-------|-------------|
| Moisture      | %     | 11.0 - 11.3 |
| Ash           | %     | 10.5 - 11.4 |
| Volatiles     | %     | 32.8 - 33.1 |
| Sulphur       | %     | 0.27 - 0.41 |
| Heating Value | GJ/t  | 24.6 - 24.9 |
| Carbon        | %     | 62.3 - 63.1 |
| Hydrogen      | %     | 4.1 - 4.2   |
| Nitrogen      | %     | 1.8 - 2     |
| Oxygen        | %     | -           |
| Chlorides     | mg/kg | 76 - 236    |
| Ca            | mg/kg | 4300        |
| Mg            | mg/kg | 1800        |
| Na and K      | mg/kg | 4500        |

Supplementary Information 2

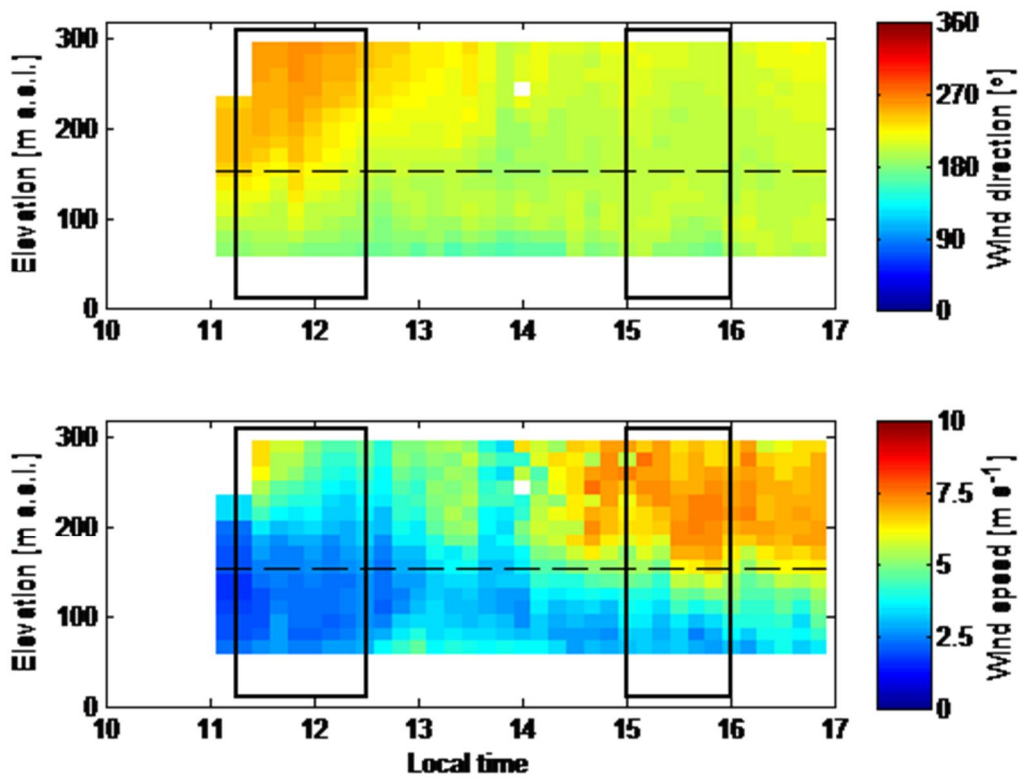

Figure S2. Lidar measurements from the studied time period, local time is UTC +2. The rectangles present the flight times and the dashed line shows the stack height.

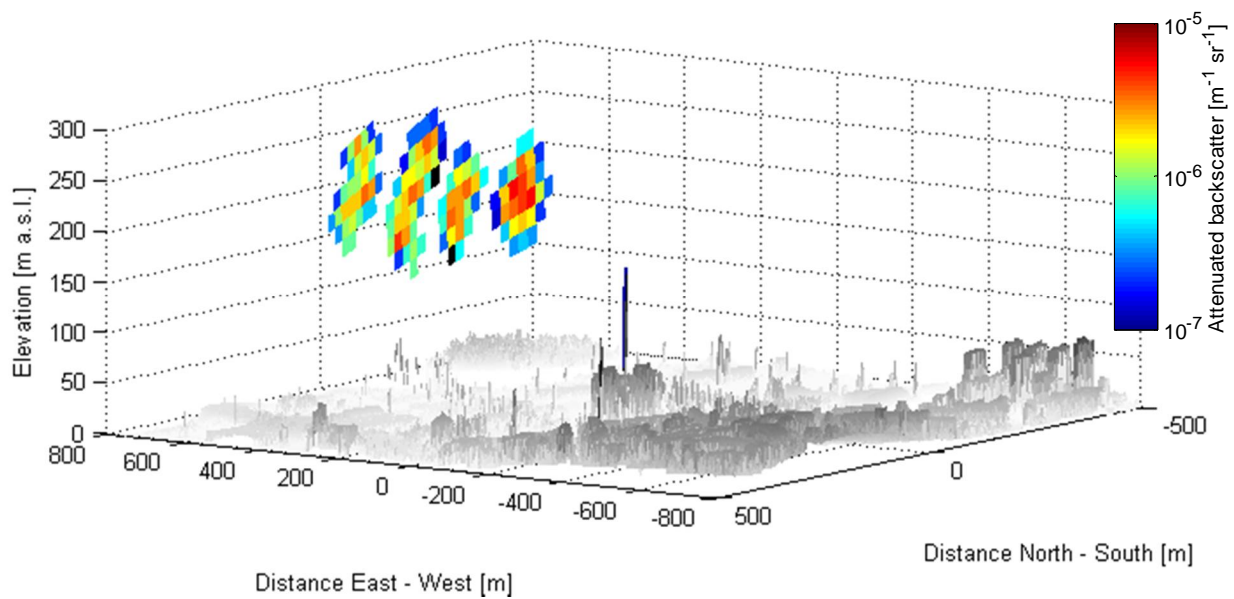

Figure S2. Lidar data from 14:43 from the measurement day, the stack is at the middle and wind is blowing 180 ° angle.

---

Table S2. Weather conditions during the flights calculated based on Kumpula data.

|                                      | FGD+FF off | FGD+FF on  |
|--------------------------------------|------------|------------|
| Temperature (°C)                     | 6.9±0.54   | 6.6±0.73   |
| Global radiation (W/m <sup>2</sup> ) | 347±57     | 466±82     |
| Visibility (m)                       | 36000±5210 | 29043±4186 |

Supplementary Information 3

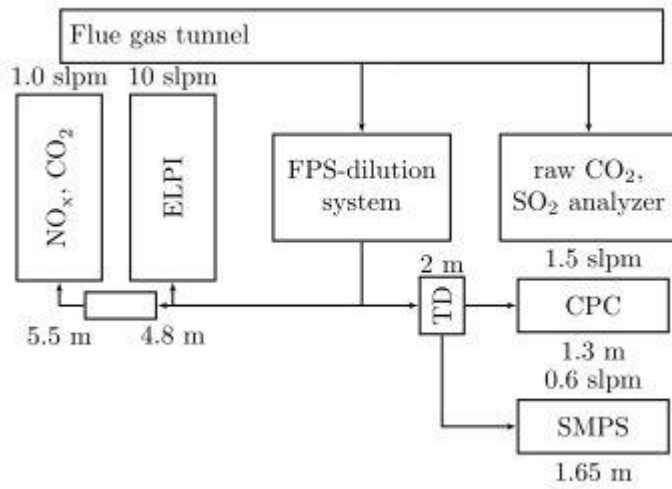

Fig S3. (a) Instrument installation at stack

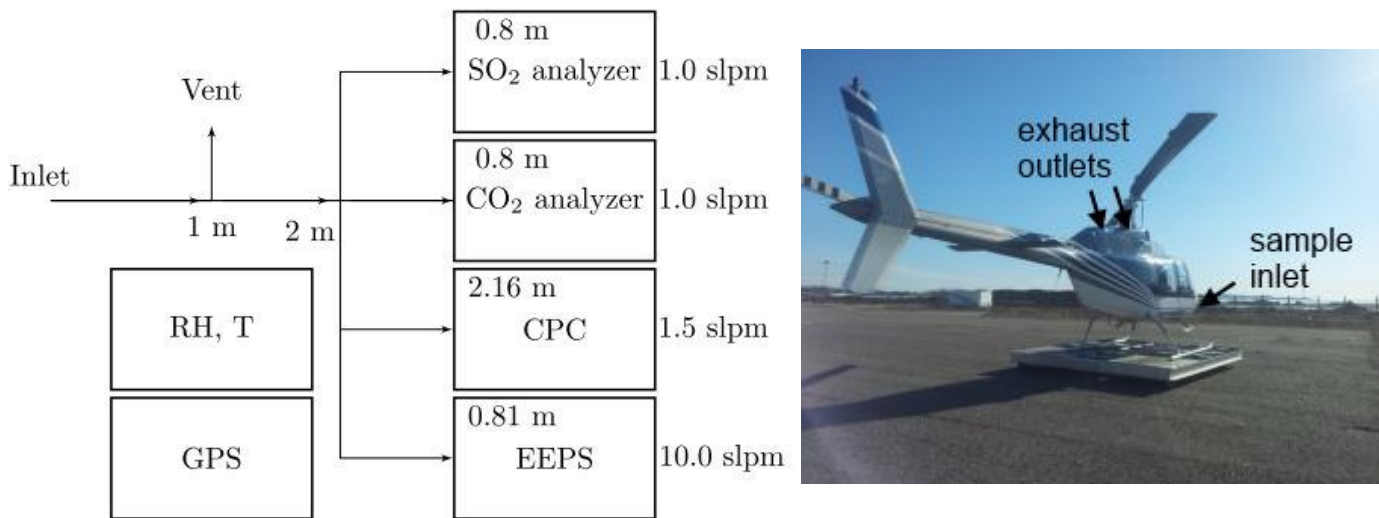

Fig S3. (b) Instrument installation in the helicopter and figure of the helicopter (sample inlet and exhaust outlets shown).

Supplementary Information 4

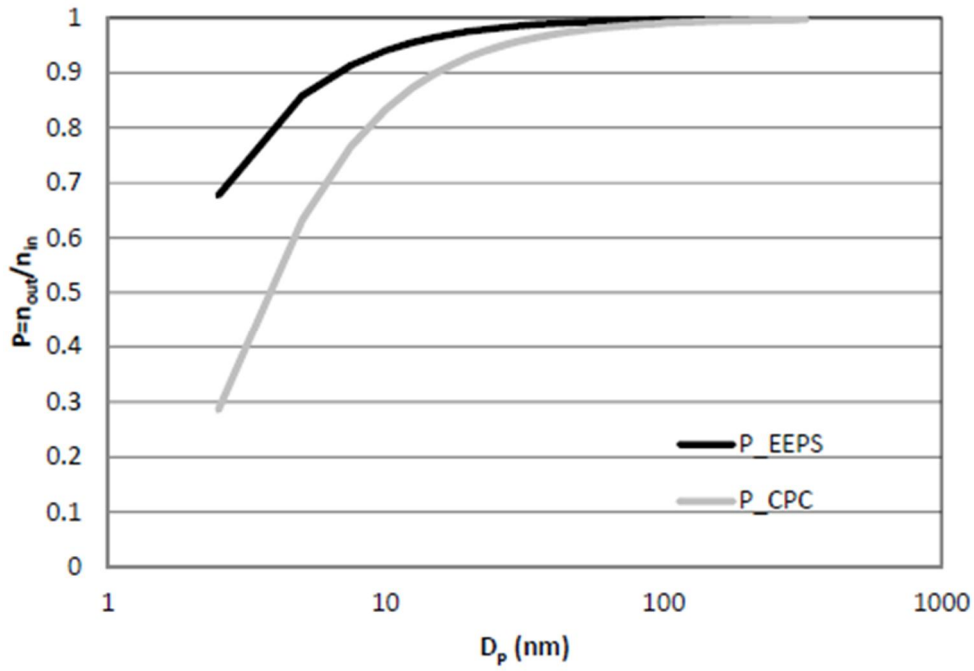

Figure S4. Diffusion losses of the particles in the helicopter sampling lines for CPC and EEPS. The diffusion losses were calculated based on the Fig. S3b.

Supplementary Information 5

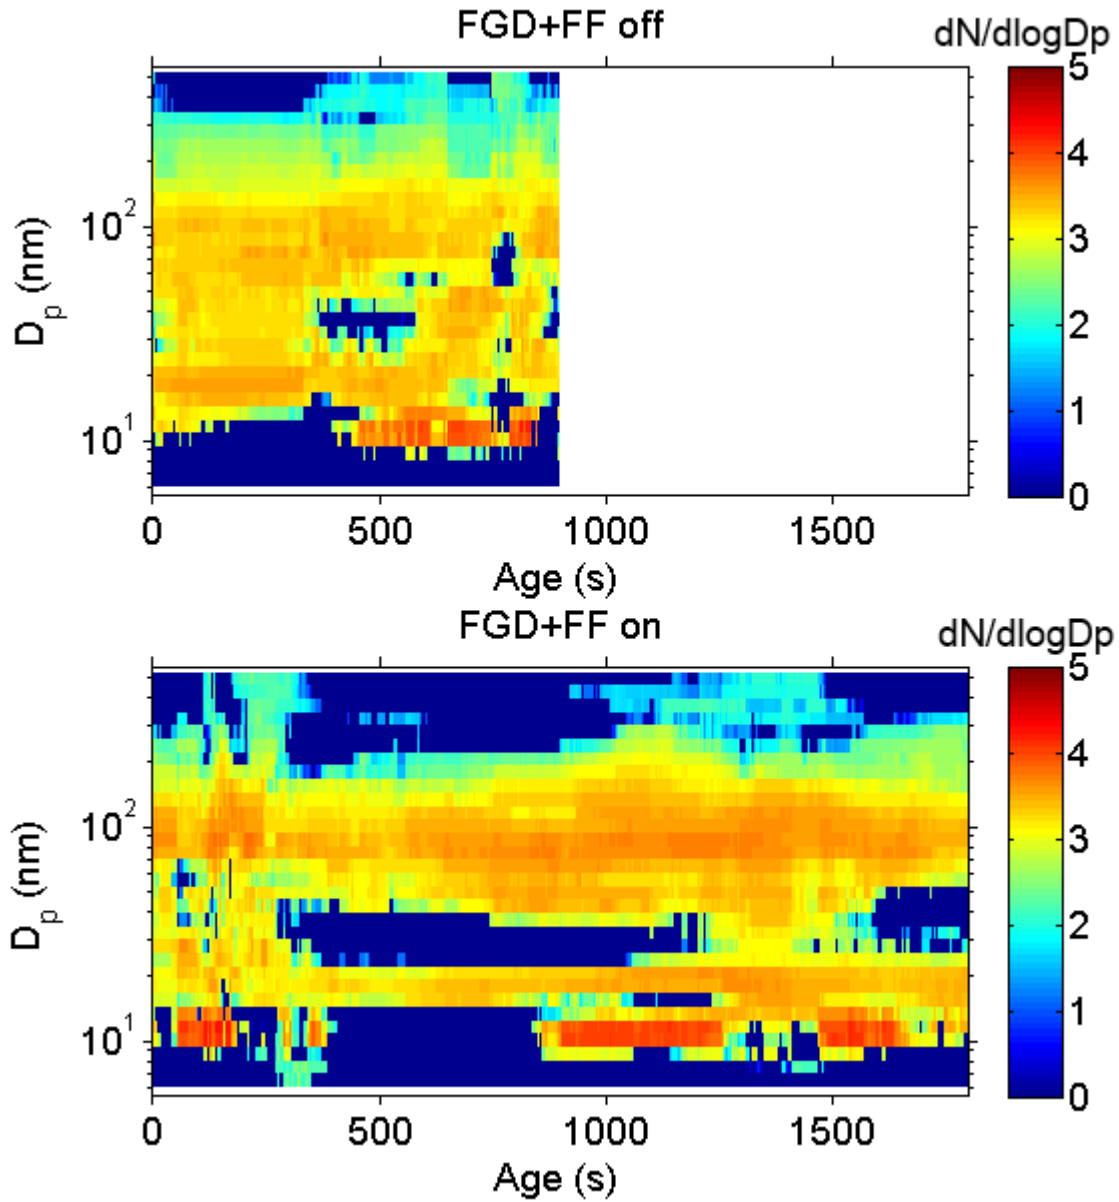

Figure S5. The particle number size distribution calculated from EEPS data as a function of plume age. Measurement was made with the EEPS installed to helicopter. The results are calculated 10 second moving median values.

Supplementary Information 6

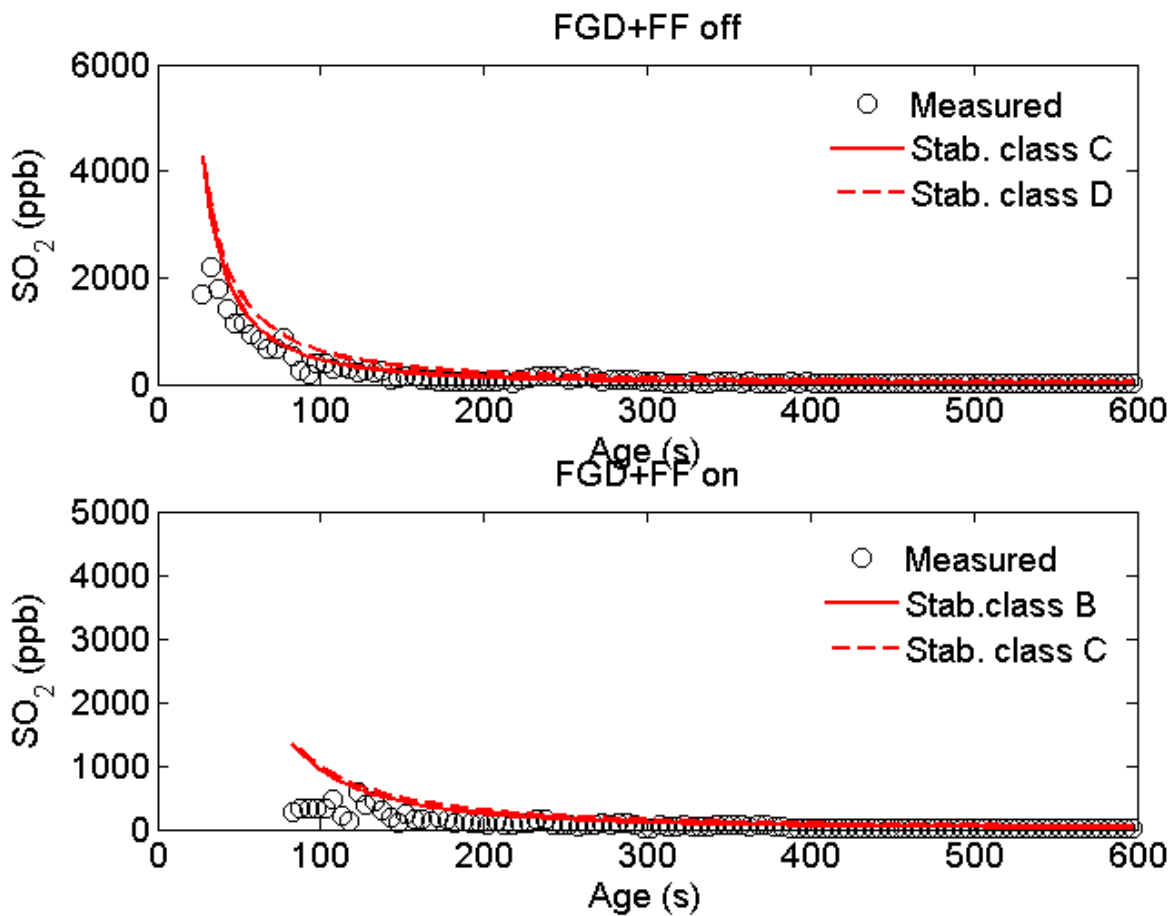

Figure S6. SO<sub>2</sub> concentration measured from the atmosphere with the helicopter and the modelled SO<sub>2</sub> concentration dilution in the atmosphere. The Gaussian dilution model was applied to the SO<sub>2</sub> concentration measured at the stack (divided by the initial dilution ratio calculated based in the CO<sub>2</sub> concentrations) and after that the SO<sub>2</sub> concentration has let to dilute.



Table S3. Details of the measurement equipment used in gaseous measurements. "in-situ" in flow rate column stands for a case that the concentration of the compound is measured directly from the source and there is no separate sample flow for the equipment. In response time column "not specified" means that there was no exact value given for the instrument.

| Gas                         | Manufacturer                              | Operation Principle                                                                                                                            | Concentration range                                                       | Precision                                     | Flow rate          | Response time                                                                                           | sampling frequency |
|-----------------------------|-------------------------------------------|------------------------------------------------------------------------------------------------------------------------------------------------|---------------------------------------------------------------------------|-----------------------------------------------|--------------------|---------------------------------------------------------------------------------------------------------|--------------------|
| Stack measurements          |                                           |                                                                                                                                                |                                                                           |                                               |                    |                                                                                                         |                    |
| SO <sub>2</sub>             | SICK sensor<br>Intelligence GM32<br>type  | Differential Optical Absorption<br>Spectroscopy, UV light                                                                                      | 0-15 ppm/0-7,000<br>ppm                                                   | ±0.3 ppm                                      | in-situ            | 5 seconds                                                                                               | 0.016 Hz           |
| raw<br>CO <sub>2</sub>      | SICK sensor<br>Intelligence, GM35<br>type | IR technique                                                                                                                                   | 0-22.5%/0-100%                                                            | ±2%                                           | in-situ            | not specified                                                                                           | 0.016 Hz           |
| H <sub>2</sub> O            | SICK sensor<br>Intelligence, GM35<br>type | IR technique                                                                                                                                   | 0-25%/0-100%                                                              | ±2%                                           | in-situ            | not specified                                                                                           | 0.016 Hz           |
| NO <sub>x</sub>             | SICK sensor<br>Intelligence, GM32<br>type | Differential Optical Absorption<br>Spectroscopy, UV light                                                                                      | NO: 0-40 ppm/0-<br>1,900 ppm<br>NO <sub>2</sub> :0-50 ppm/0-<br>1,000 ppm | NO: ±0.8 ppm<br>NO <sub>2</sub> : ±2.5<br>ppm | in-situ            | 5 seconds                                                                                               | 0.016 Hz           |
| O <sub>2</sub>              | Enotec Oxitec<br>5000                     | Zirconium oxide detector                                                                                                                       | ppp-100%                                                                  | ±0.2% from<br>measurement<br>value            | in-situ            | 0.5 seconds                                                                                             | 0.016 Hz           |
| Flue gas plume measurements |                                           |                                                                                                                                                |                                                                           |                                               |                    |                                                                                                         |                    |
| CO <sub>2</sub>             | Picarro G1301-m                           | Cavity Ring-Down<br>Spectroscopy (CPDS) technique to<br>measure the gas specific absorption<br>spectrum                                        | 300 ppm-700 ppm                                                           | < 200 ppb                                     | 0.35-0.45<br>L/min | 0.05 seconds                                                                                            | > 0.5 Hz           |
| SO <sub>2</sub>             | Thermo Scientific<br>Inc.                 | ultraviolet (UV) fluorescence method<br>where<br>SO <sub>2</sub> molecule absorbs UV light reaching<br>an excited state at specific wavelength | 0-1000 ppb                                                                | 50 ppt                                        | 0.5 l/min          | Is modified<br>from 80<br>seconds to 5<br>sec, but this<br>was taken into<br>account in<br>calculations | 1 Hz               |
